# Supplementary material for: Cellular and Axonal Diversity in Molecular Layer Heterotopia of the Rat Cerebellar Vermis
Source: Hindawi journal article supplement (doi:10.1155/2013/805467), 2013-01-01

Supplementary Figure 1

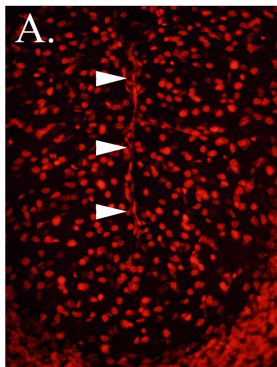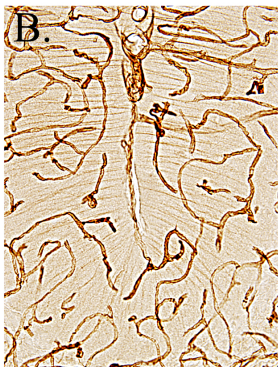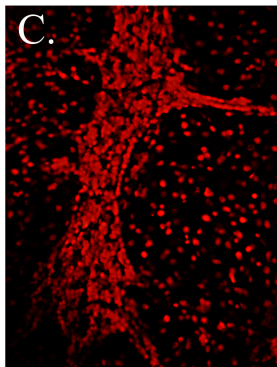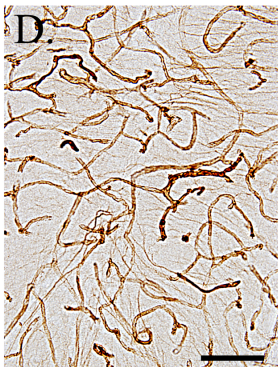

Supplement: f1 [file 805467.f1.pdf]
